# Supplementary material for: Temperature-Biased miRNA Expression Patterns during European Sea Bass (Dicentrarchus labrax) Development
Source: MDPI journal article supplement (doi:10.3390/ijms231911164), 2022-09-22
Supplement: s1 [file s1]

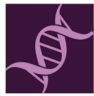

## Supplemental table S5

### Temperature-biased miRNA expression patterns during European sea bass (*Dicentrarchus labrax*) development.

Maria Papadaki<sup>1,2</sup>, Elisavet Kaitetzidou<sup>1</sup>, Ioannis Papadakis<sup>1</sup>, Dimitris Sfakianakis<sup>2</sup>, Papandroulakis N.<sup>1</sup>, Constantinos C. Mylonas<sup>1</sup>, Elena Sarropoulou<sup>1\*</sup>

|         | Stage            | Mouth opening | First feeding | Flexion      | All fins     | Metamorphosis |
|---------|------------------|---------------|---------------|--------------|--------------|---------------|
| 20 °C   | Age (dph)        | 3             | 6             | 18           | 40           | 53            |
|         | Mean length (mm) | 5,17 ± 0.14   | 5,53 ± 0.12   | 10,47 ± 1.19 | 21 ± 0.5     | 29,67 ± 3.43  |
| 17,5 °C | Age (dph)        | 5             | 9             | 20           | 47           | 62            |
|         | Mean length (mm) | 5,53 ± 0.08   | 5,86 ± 0.15   | 10,94 ± 0.7  | 20,63 ± 0.79 | 27,35 ± 1.46  |
| 15 °C   | Age (dph)        | 6             | 11            | 30           | 53           | 86            |
|         | Mean length (mm) | 5,41 ± 0.11   | 5,78 ± 0.13   | 12,09 ± 0.96 | 19,25 ± 0.76 | 29,10 ± 2.97  |
